1 **Title:** COVID-19 Testing and Vaccination among US Older Adults with Vision Impairment: The  
2 National Health and Aging Trends Study 2021

3  
4 **Authors:** Louay Almidani, MD, MSc<sup>1</sup>, Bonnielin K. Swenor, PhD, MPH<sup>2,3</sup>, Joshua R. Ehrlich, MD,  
5 MPH<sup>4,5</sup>, Varshini Varadaraj, MD, MPH<sup>2,3</sup>

6  
7 **Affiliations**

8 <sup>1</sup> Wilmer Eye Institute, Johns Hopkins University School of Medicine, Baltimore, Maryland.

9 <sup>2</sup> Johns Hopkins Disability Health Research Center, Johns Hopkins University, Baltimore,  
10 Maryland

11 <sup>3</sup> Johns Hopkins University School of Nursing, Baltimore, Maryland

12 <sup>4</sup> Department of Ophthalmology and Visual Sciences, University of Michigan, Ann Arbor

13 <sup>5</sup> Institute for Social Research, University of Michigan, Ann Arbor

14

15 **Abstract**

16 **Purpose:** To examine the associations between vision impairment (VI) and COVID-19 testing  
17 and vaccination services in older US adults.

18

19 **Methods:** This cross-sectional study assessed data from adults  $\geq 65$  years who participated in  
20 the National Health and Aging Trends Study (year 2021), a nationally representative sample of  
21 Medicare beneficiaries. Exposure: Distance VI ( $<20/40$ ), near VI ( $<20/40$ ), contrast sensitivity  
22 impairment (CSI) ( $<1.55$  logCS), and any VI (distance, near, or CSI). Outcomes: Self-reported  
23 COVID-19 testing and vaccination.

24

25 **Results:** Of 2,822 older adults, the majority were female (weighted; 55%) and White (82%), and  
26 32% had any VI. In fully-adjusted regression analyses, older adults with any VI had similar  
27 COVID-19 vaccination rates to adults without any VI (OR:0.77, 95% CI:0.54–1.09), but had lower  
28 odds of COVID-19 testing (OR:0.82, 95% CI:0.68–0.97). Older adults with distance (OR:0.47, 95%  
29 CI:0.22–0.99) and near (OR:0.68, 95% CI:0.47–0.99) VI were less likely to be vaccinated for  
30 COVID-19, while those with CSI were less likely to test for COVID-19 (OR:0.76, 95% CI:0.61–  
31 0.95), as compared to peers without respective impairments. The remaining associations were  
32 not significant ( $p>.05$ ).

33

34 **Conclusions and Relevance:** These findings highlight inequities in the COVID-19 pandemic  
35 response for people with vision disability and emphasize the need for equitable prioritization of  
36 accessibility of healthcare services for all Americans.

37 **1. Introduction**

38 COVID-19, stemming from the severe acute respiratory syndrome coronavirus 2 (SARS-CoV-2),  
39 is a significant contributor to morbidity and mortality, with the elderly population emerging as  
40 the most susceptible cohort.<sup>1</sup> Further, older age is also often associated with an increased  
41 prevalence of vision impairment (VI).<sup>2</sup> As a result, adults with VI may be at a higher risk of  
42 experiencing severe COVID-19 outcomes, underscoring the importance of preventive  
43 healthcare services, including vaccinations.

44  
45 The development of the COVID-19 vaccine has caused a major shift during the pandemic,  
46 resulting in millions of lives saved globally. Watson et al (2022) estimated that vaccinations  
47 prevented over 14 million deaths from COVID-19 across 185 countries and territories.<sup>3</sup>  
48 Nonetheless, the impact of vaccinations has been hindered by the inadequate vaccine  
49 accessibility in certain communities.<sup>3</sup>

50  
51 The COVID-19 pandemic has had a disproportionate impact on people with disabilities,  
52 including those with VI.<sup>4</sup> It has exacerbated existing barriers in accessing essential preventive  
53 healthcare services, such as vaccination and testing.<sup>5</sup> Studies have shown that adults with VI are  
54 less likely to use preventive services,<sup>6</sup> including lower vaccine initiation rates,<sup>7</sup> and experience  
55 worse health outcomes than adults without VI.<sup>8</sup> Additionally, individuals with VI may face  
56 challenges in navigating healthcare systems and accessing public health information, which  
57 could increase their risk of COVID-19 or other illnesses.<sup>9</sup>

58

59 Despite these associations, previous studies lacked generalizability or only assessed one aspect  
60 of vision. Vision is a complex process, and while distance visual acuity (the ability to see objects  
61 at a distance) is most frequently used in research studies as a measure of visual function,<sup>10</sup> it  
62 only represents one component of visual function.<sup>11</sup> Recent findings suggest that other aspects  
63 of vision, such as near visual acuity (the ability to see objects located close to the eyes, which is  
64 important for tasks like reading) and contrast sensitivity (the ability to perceive differences in  
65 shades and distinguish objects from their background), can also impact daily functioning.<sup>12-14</sup>

66  
67 Accordingly, we utilized data from the National Health and Aging Trends Study (NHATS), a US  
68 population-based, nationally representative sample of Medicare beneficiaries, to assess the  
69 potential associations of three measures of vision — distance visual acuity (VA), near VA, and  
70 contrast sensitivity (CS) — with COVID-19 vaccination and testing in a national sample of older  
71 adults, as they are at risk of VI and worse COVID-19 outcomes.<sup>4</sup>

72

## 73 **2. Materials and Methods**

### 74 **2.1 Study design and participants**

75 This cross-sectional study presents data from the NHATS Round 11 (2021), a nationally  
76 representative sample of Medicare beneficiaries aged  $\geq 65$  years in the United States.<sup>15</sup> In-home  
77 interviews and performance-based tests, including vision testing, were conducted annually  
78 from approximately June to November.<sup>16</sup> Further details regarding survey sampling design have  
79 been previously described.<sup>15,16</sup> Written informed consent was obtained from all participants or  
80 their proxies. This secondary analysis of publicly available data was acknowledged as exempt

81 research by the institutional review board of the Johns Hopkins School of Medicine. The study  
82 adheres to the Strengthening the Reporting of Observational Studies in Epidemiology (STROBE)  
83 reporting guidelines for cross-sectional studies.

84

## 85 2.2 Vision Measures

86 In 2021, the NHATS introduced three objective vision tests (distance and near VA, and CS) that  
87 measured presenting binocular vision while wearing habitual correction (glasses or contacts).  
88 Tests were conducted via Ridgevue Vision tablet-based tests ([ridgevue.com](https://www.ridgevue.com)), which show good  
89 agreement with corresponding gold standard tests (ETDRS distance acuity, MNRead near  
90 acuity, and Pelli-Robson contrast sensitivity), and enable standardized monitoring to occur in a  
91 variety of settings, including at home or in rehabilitation facilities.<sup>17,18</sup>

92

93 For distance VA testing, participants sat five feet away from the tablet and were instructed to  
94 read five letters per screen with each subsequent screen displaying reduced letter size. For near  
95 VA testing, participants held the tablet at their usual reading distance and were instructed to  
96 read five letters per screen with each subsequent screen displaying smaller letters. For CS  
97 testing, participants were instructed to read two letters per screen, with the tone becoming  
98 lighter with each subsequent screen. Further details on how the tests were conducted have  
99 been described previously.<sup>17,19</sup> Distance and near VA were calculated as the logarithm of the  
100 minimum angle of resolution (logMAR), with near VA accounting for reading distance. CS was  
101 measured in logCS units. We assessed vision on a continuous scale; distance and near VA (per  
102 0.1 logMAR), and CS (per 0.1 logCS), and on a categorical scale; distance VI (<20/40), near VI

103 (<20/40) – based on the US American Academy of Ophthalmology definitions,<sup>20</sup> – and CS  
104 impairment (CSI) (<1.55), as previously defined.<sup>21</sup> Any objective VI was defined as having VI in  
105 either distance, near, or CS, and was taken as the primary exposure.

106

### 107 2.3 Outcomes

108 We examined two sets of outcomes: COVID-19 vaccination and COVID-19 testing. Participants  
109 were considered to have been COVID-19 vaccinated or tested if they answered “yes” to any of  
110 the following questions respectively: (1) Have you been vaccinated for COVID-19? (2) Have you  
111 ever been tested for COVID-19? Outcomes were based on self-reports and were recorded in the  
112 NHATS dataset as binary variables (yes/no).

113

### 114 2.4 Covariates

115 Demographic characteristic covariates included age (categorized into five age intervals: 70-74,  
116 75-79, 80-84, 85-89, and  $\geq 90$ ; continuous age is not provided in the publicly available NHATS  
117 data), gender (male, female), race (Non-Hispanic White, Non-Hispanic Black, Hispanic, and  
118 other), education ( $\leq$  high school, some college, and  $\geq$  college graduate), living arrangements  
119 (alone or not alone), and number of comorbidities (0-1, 2, 3, and  $\geq 4$ ). Comorbidities include  
120 self-reported diagnoses of diabetes, hypertension, myocardial infarction, arthritis  
121 (osteoarthritis or rheumatoid arthritis), osteoporosis, stroke, lung disease (such as emphysema,  
122 asthma, or chronic bronchitis), cancer, and hip fracture. Covariates were included based on  
123 clinical relevance and/or previous demonstration of impact on VI and preventive healthcare  
124 use.

125

## 126 2.5 Statistical Analysis

127 In NHATS Round 11, a total of 3,817 participants were sampled, and interview data were  
128 obtained by direct contact with either the participant or a proxy respondent. **Figure 1** describes  
129 the analytic population. Descriptive statistics were used to characterize the participants by any  
130 VI status. Comparisons were performed using Pearson's chi-squared test for categorical  
131 variables and Wilcoxon rank-sum test for continuous variables.

132

133 Multivariable logistic regression models were used to investigate the association between  
134 various vision measures and COVID-19 vaccination and testing. While our primary exposure was  
135 any VI, we constructed separate regression models for each vision variable, including distance  
136 VI, near VI, and CSI. We also assessed vision on a continuous scale; distance and near VA (per  
137 0.1 logMAR), and CS (per 0.1 logCS). All analyses accounted for the NHATS complex survey  
138 design and models were adjusted for age, sex, race/ethnicity, education, living arrangement,  
139 and comorbidities. "Don't know" and "Refuse" responses were treated as missing values and  
140 excluded from the regressions. Statistical significance was defined at  $p < .05$  and 2-sided values  
141 are presented. All analyses were performed using Stata/SE 16.1 (StatCorp LLC, College Station,  
142 TX, USA) software.

143

## 144 **3. Results**

145 Among a sample of 2,822 community-dwelling older adults representing 26,182,090 older  
146 adults nationally, the majority was female (55%) and White (82%), and 32% had any VI (**Table**

147 1). Of the total sample, 91% adults were vaccinated for COVID-19, and 53% had ever tested for  
148 COVID-19. The prevalence of COVID-19 vaccination did not differ by any VI status, but the  
149 prevalence of COVID-19 testing was 11% lower among adults with any VI than adults without  
150 VI. Further, COVID-19 vaccination rates were 5% lower in adults with near VI (vs. no near VI),  
151 while COVID-19 testing rates were 15% lower in adults with CSI (vs. no CSI). There were no  
152 significant differences in the COVID-19 vaccination and testing rates for the other vision  
153 measures (**Figure 2**).

154  
155 In multivariable logistic regression analysis, older adults with any VI had similar COVID-19  
156 vaccination rates compared to adults without (OR: 0.77, 95% CI: 0.54–1.09), but had lower odds  
157 of testing for COVID-19 (OR: 0.82, 95% CI: 0.68–0.97) (**Table 2**). When examining individual  
158 objective vision measures categorically, older adults with distance (OR: 0.47, 95% CI: 0.22–0.99)  
159 and near (OR: 0.68, 95% CI: 0.47–0.99) VI had lower odds of being vaccinated, and adults with  
160 CSI were less likely to test for COVID-19 (OR: 0.76, 95% CI: 0.61–0.95), than their respective  
161 peers without impairments. The remaining associations were not significant ( $p > .05$ ).

162  
163 When examined on a continuous scale, adults with worse distance (OR: 0.48, 95% CI: 0.24–  
164 0.96), and near (OR: 0.32, 95% CI: 0.16–0.65) VA, (per 0.1 logMAR) were less likely to be  
165 vaccinated, however, only adults with worse distance VA were less likely to test for COVID-19  
166 (OR: 0.41, 95% CI: 0.26–0.65). Similarly, adults with worse CS (per 0.1 logCS) were less likely to  
167 test for COVID-19 (0.50, 95% CI: 0.36–0.71) but did not have differences in vaccination rates as  
168 compared to peers without CSI.



169  
170  
171

#### 4. Discussion

172 In a nationally representative sample of US older adults, adults with VI were less likely to get  
173 vaccinated or tested for COVID-19, depending on the measure of visual function. Interestingly,  
174 for each 0.1 logMAR deterioration in distance or near VA, the likelihood of seeking COVID-19  
175 vaccination was reduced to less than half. Similarly, the odds of undergoing COVID-19 testing  
176 were equal to or less than half per 0.1 logMAR in distance VA and 0.1 logCS in CS compared to  
177 their counterparts without respective impairments. Conversely, near VA (per 0.1 logMAR)  
178 trended towards lower odds of undergoing COVID-19 testing, while CS (per 0.1 logCS) trended  
179 towards lower odds of vaccination, though neither reached statistical significance.

180

181 Our findings are consistent with prior studies showing that people with VI are less likely to  
182 utilize COVID-19 healthcare services.<sup>7,22</sup> This may be due to a range of barriers within the  
183 healthcare system, such as issues with accessibility of information and services, and  
184 insurance.<sup>4,5,23</sup> In particular, adults with VI may experience greater difficulties with accessing  
185 COVID-19 information on public websites due to poor CS and other webpage accessibility  
186 challenges.<sup>4</sup> Additionally, transportation to drive-through testing sites posed a significant hurdle  
187 in accessing testing and vaccination services, which were exacerbated by regulations such as  
188 social distancing mandates.<sup>4,5,23</sup> These findings are concerning, as vaccinations are essential in  
189 maintaining health, and preventing severe COVID-19-associated outcomes.<sup>24</sup> Future work is  
190 needed to examine if these disparities in COVID-19 healthcare services translate to worse  
191 COVID-19-related health outcomes for older adults with VI.

192

193 It is essential to recognize the challenges faced by the VI community and develop strategies to  
194 promote health equity and improve access to essential healthcare services. One such strategy is  
195 to move towards universal design principles, which aim to create products, environments, and  
196 systems that are accessible to everyone, including people with disabilities.<sup>25</sup> By promoting  
197 universal design and addressing inaccessibility, we can ensure that individuals with VI have  
198 equal access to healthcare services, thereby improving their independence, health, and overall  
199 well-being.

200

201 Our study has some limitations. It is unclear what is meant by “been vaccinated for COVID-19?”  
202 as NHATS does not specify whether it refers to full primary vaccination or one of two doses.  
203 Further, the NHATS does not specify the type of COVID-19 test used (polymerase chain reaction  
204 vs. antigen), or testing location (home test vs. or testing center). It is worth noting that some  
205 vision measures were associated with lower testing and vaccination, while others were not.  
206 This may reflect real-world differences in how various vision measures impact individuals’  
207 functioning but could also be influenced by the sample size and statistical power. Irrespective,  
208 overall, these findings suggest that VI is associated with reduced utilization of COVID-19 testing  
209 and vaccination services among older adults.

210

## 211 **5. Conclusion**

212 This study highlights the inequities in the COVID-19 pandemic response for older Americans  
213 with vision disability and emphasizes the importance of prioritizing accessibility of healthcare  
214 services, especially COVID-19 testing and vaccination services for all people.



216 **Acknowledgement/Financial Support:** None relevant to work presented.

217 **Conflict of Interest:** All listed authors have no conflicts of interest in any materials discussed in  
218 this article.

219 **Data availability statement:** Data is publicly available at <https://nhats.org/researcher>

220

221

222 **References:**

223

- 224 1. Banerjee D. The impact of Covid-19 pandemic on elderly mental health. *Int J Geriatr*  
225 *Psychiatry*. 2020;35(12):1466-1467. doi:10.1002/gps.5320
- 226 2. Almidani L, Varadaraj V, Mihailovic A, Ramulu PY. Using Objective Vision Measures to  
227 Explore the Association of Vision Impairment With Cognition Among Older Adults in the  
228 United States. *Am J Ophthalmol*. 2023;255:18-29. doi:10.1016/j.ajo.2023.05.020
- 229 3. Watson OJ, Barnsley G, Toor J, Hogan AB, Winskill P, Ghani AC. Global impact of the  
230 first year of COVID-19 vaccination: a mathematical modelling study. *Lancet Infect Dis*.  
231 2022;22(9):1293-1302. doi:10.1016/S1473-3099(22)00320-6
- 232 4. Jo G, Habib D, Varadaraj V, et al. COVID-19 vaccine website accessibility dashboard.  
233 *Disabil Health J*. 2022;15(3):101325. doi:10.1016/j.dhjo.2022.101325
- 234 5. Epstein S, Campanile J, Cerilli C, Gajwani P, Varadaraj V, Swenor BK. New obstacles  
235 and widening gaps: A qualitative study of the effects of the COVID-19 pandemic on U.S.  
236 adults with disabilities. *Disabil Health J*. 2021;14(3):101103.  
237 doi:10.1016/j.dhjo.2021.101103
- 238 6. Assi L, Varadaraj V, Shakarchi AF, et al. Association of Vision Impairment With  
239 Preventive Care Use Among Older Adults in the United States. *JAMA Ophthalmol*.  
240 2020;138(12):1298. doi:10.1001/jamaophthalmol.2020.4524
- 241 7. Turner K, Nguyen OT, Alishahi Tabriz A, Islam JY, Hong YR. COVID-19 Vaccination  
242 Rates Among US Adults With Vision or Hearing Disabilities. *JAMA Ophthalmol*.  
243 2022;140(9):894. doi:10.1001/jamaophthalmol.2022.3041
- 244 8. Varadaraj V, Ehrlich JR, Swenor BK. Vision Impairment Has Implications for Aging and  
245 Health Outcomes, Beyond Ophthalmology. *JAMA Netw Open*. 2022;5(5):e2214610.  
246 doi:10.1001/jamanetworkopen.2022.14610
- 247 9. Spencer C, Frick K, Gower E, Kempen J, Wolff J. Disparities in Access to Medical Care  
248 for Individuals with Vision Impairment. *Ophthalmic Epidemiol*. 2009;16(5):281-288.  
249 doi:10.3109/09286580902999439

- 250 10. HAEGERSTROM-PORTNOY G, SCHNECK ME, LOTT LA, BRABYN and JA. The  
251 Relation Between Visual Acuity and Other Spatial Vision Measures. *Optometry and*  
252 *Vision Science*. 2000;77(12):653-662. doi:10.1097/00006324-200012000-00012
- 253 11. Varadaraj V, Ehrlich JR, Swenor BK. Vision Impairment Has Implications for Aging and  
254 Health Outcomes, Beyond Ophthalmology. *JAMA Netw Open*. 2022;5(5):e2214610.  
255 doi:10.1001/jamanetworkopen.2022.14610
- 256 12. Myers VS. Distance and Near Visual Acuity, Contrast Sensitivity, and Visual Fields of  
257 10-Year-Old Children. *Archives of Ophthalmology*. 1999;117(1):94.  
258 doi:10.1001/archopht.117.1.94
- 259 13. Varadaraj V, Munoz B, Deal JA, et al. Association of Vision Impairment With Cognitive  
260 Decline Across Multiple Domains in Older Adults. *JAMA Netw Open*.  
261 2021;4(7):e2117416. doi:10.1001/jamanetworkopen.2021.17416
- 262 14. Swenor BK, Simonsick EM, Ferrucci L, Newman AB, Rubin S, Wilson V. Visual  
263 Impairment and Incident Mobility Limitations: The Health, Aging and Body Composition  
264 Study. *J Am Geriatr Soc*. 2015;63(1):46-54. doi:10.1111/jgs.13183
- 265 15. Vicki A. Freedman, Jennifer A. Schrack, Maureen E. Skehan, and Judith D. Kasper. 2022.  
266 National Health and Aging Trends Study User Guide: Rounds 1-11 Final Release.  
267 Baltimore: Johns Hopkins University School of Public Health. Available at  
268 [www.NHATS.org](http://www.NHATS.org). ([https://www.nhats.org/sites/default/files/2022-](https://www.nhats.org/sites/default/files/2022-11/NHATS_User_Guide_R11_Final_Release.pdf)  
269 [11/NHATS\\_User\\_Guide\\_R11\\_Final\\_Release.pdf](https://www.nhats.org/sites/default/files/2022-11/NHATS_User_Guide_R11_Final_Release.pdf)).
- 270 16. Freedman VA, Kasper JD. Cohort Profile: The National Health and Aging Trends Study  
271 (NHATS). *Int J Epidemiol*. 2019;48(4):1044-1045g. doi:10.1093/ije/dyz109
- 272 17. Hu, Mengyao, Joshua R. Ehrlich, Nicholas S. Reed, Vicki A. Freedman. 2022. National  
273 Health and Aging Trends Study (NHATS) Vision and Hearing Activities User Guide.  
274 Johns Hopkins University School of Public Health. Available at [www.NHATS.org](http://www.NHATS.org).  
275 ([https://www.nhats.org/sites/default/files/2022-](https://www.nhats.org/sites/default/files/2022-07/NHATS%20Vision%20and%20Hearing%20Activities%20User%20Guide.pdf)  
276 [07/NHATS%20Vision%20and%20Hearing%20Activities%20User%20Guide.pdf](https://www.nhats.org/sites/default/files/2022-07/NHATS%20Vision%20and%20Hearing%20Activities%20User%20Guide.pdf)).
- 277 18. Varadaraj V, Assi L, Gajwani P, et al. Evaluation of Tablet-Based Tests of Visual Acuity  
278 and Contrast Sensitivity in Older Adults. *Ophthalmic Epidemiol*. 2021;28(4):293.  
279 doi:10.1080/09286586.2020.1846758

- 280 19. Hu M, Freedman VA, Ehrlich JR, Reed NS, Billington C, Kasper JD. Collecting  
281 Objective Measures of Visual and Auditory Function in a National in-Home Survey of  
282 Older Adults. *J Surv Stat Methodol*. 2021;9(2):309-334. doi:10.1093/JSSAM/SMAA044
- 283 20. Low Vision - American Academy of Ophthalmology. Accessed April 10, 2023.  
284 <https://www.aaof.org/education/low-vision-and-vision-rehab>
- 285 21. Mäntyjärvi M, Laitinen T. Normal values for the Pelli-Robson contrast sensitivity test. *J*  
286 *Cataract Refract Surg*. 2001;27(2):261-266. doi:10.1016/S0886-3350(00)00562-9
- 287 22. Ryerson AB, Rice CE, Hung MC, et al. Disparities in COVID-19 Vaccination Status,  
288 Intent, and Perceived Access for Noninstitutionalized Adults, by Disability Status —  
289 National Immunization Survey Adult COVID Module, United States, May 30–June 26,  
290 2021. *MMWR Morb Mortal Wkly Rep*. 2021;70(39):1365-1371.  
291 doi:10.15585/mmwr.mm7039a2
- 292 23. Shalaby WS, Odayappan A, Venkatesh R, et al. The Impact of COVID-19 on Individuals  
293 Across the Spectrum of Visual Impairment. *Am J Ophthalmol*. 2021;227:53-65.  
294 doi:10.1016/j.ajo.2021.03.016
- 295 24. Yuan Y, Thierry JM, Bull-Otterson L, et al. COVID-19 Cases and Hospitalizations  
296 Among Medicare Beneficiaries With and Without Disabilities — United States, January 1,  
297 2020–November 20, 2021. *MMWR Morb Mortal Wkly Rep*. 2022;71(24):791-796.  
298 doi:10.15585/mmwr.mm7124a3
- 299 25. Samuel LJ, Xiao E, Cerilli C, et al. The development of the Supplemental Nutrition  
300 Assistance Program enrollment accessibility (SNAP-access) score. *Disabil Health J*.  
301 2022;15(4):101366. doi:10.1016/j.dhjo.2022.101366

302  
303

NHATS Round 11 (2021) participants  
**(n=3,817)**

Excluded:  
Deceased participants **(n=351)**  
Nursing home residents **(n=218)**  
Participants who did not attempt any vision  
activities **(n=391)**  
Participants with missing visual acuity or  
contrast sensitivity data **(n=35)**

Participants with complete vision data and  
COVID-19 data **(n=2,822)**



# COVID-19 Vaccination

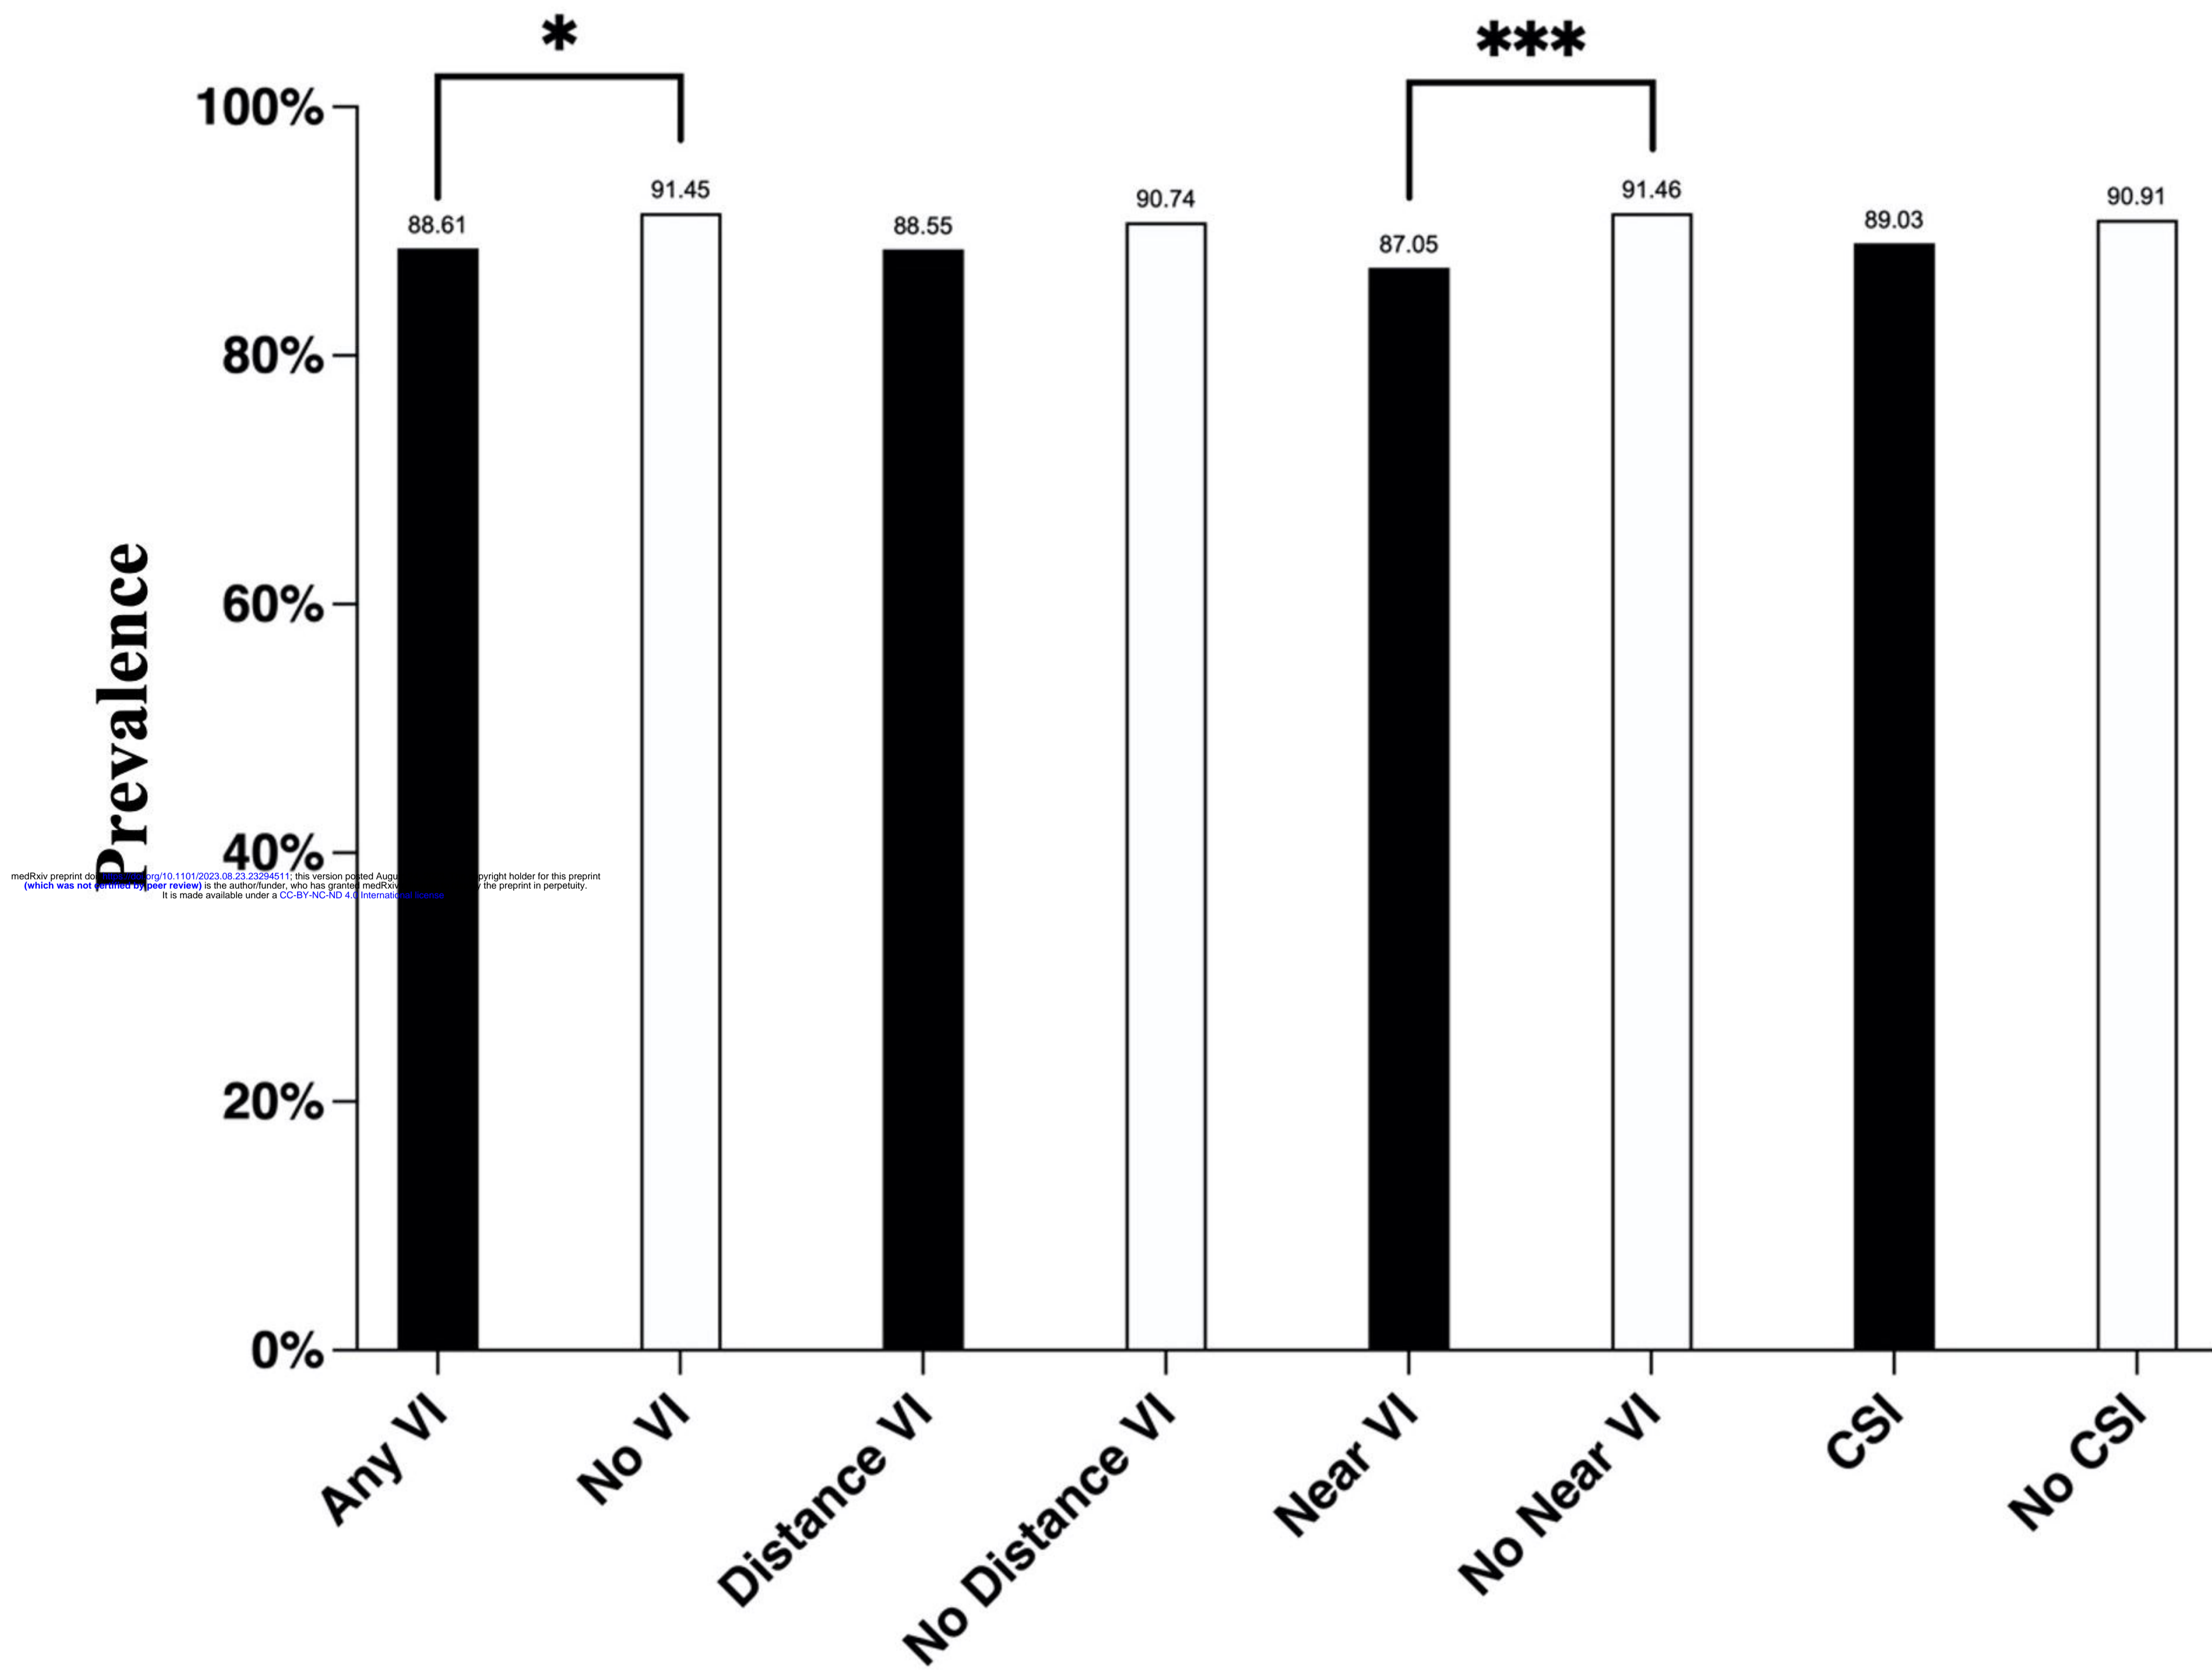

# COVID-19 Testing

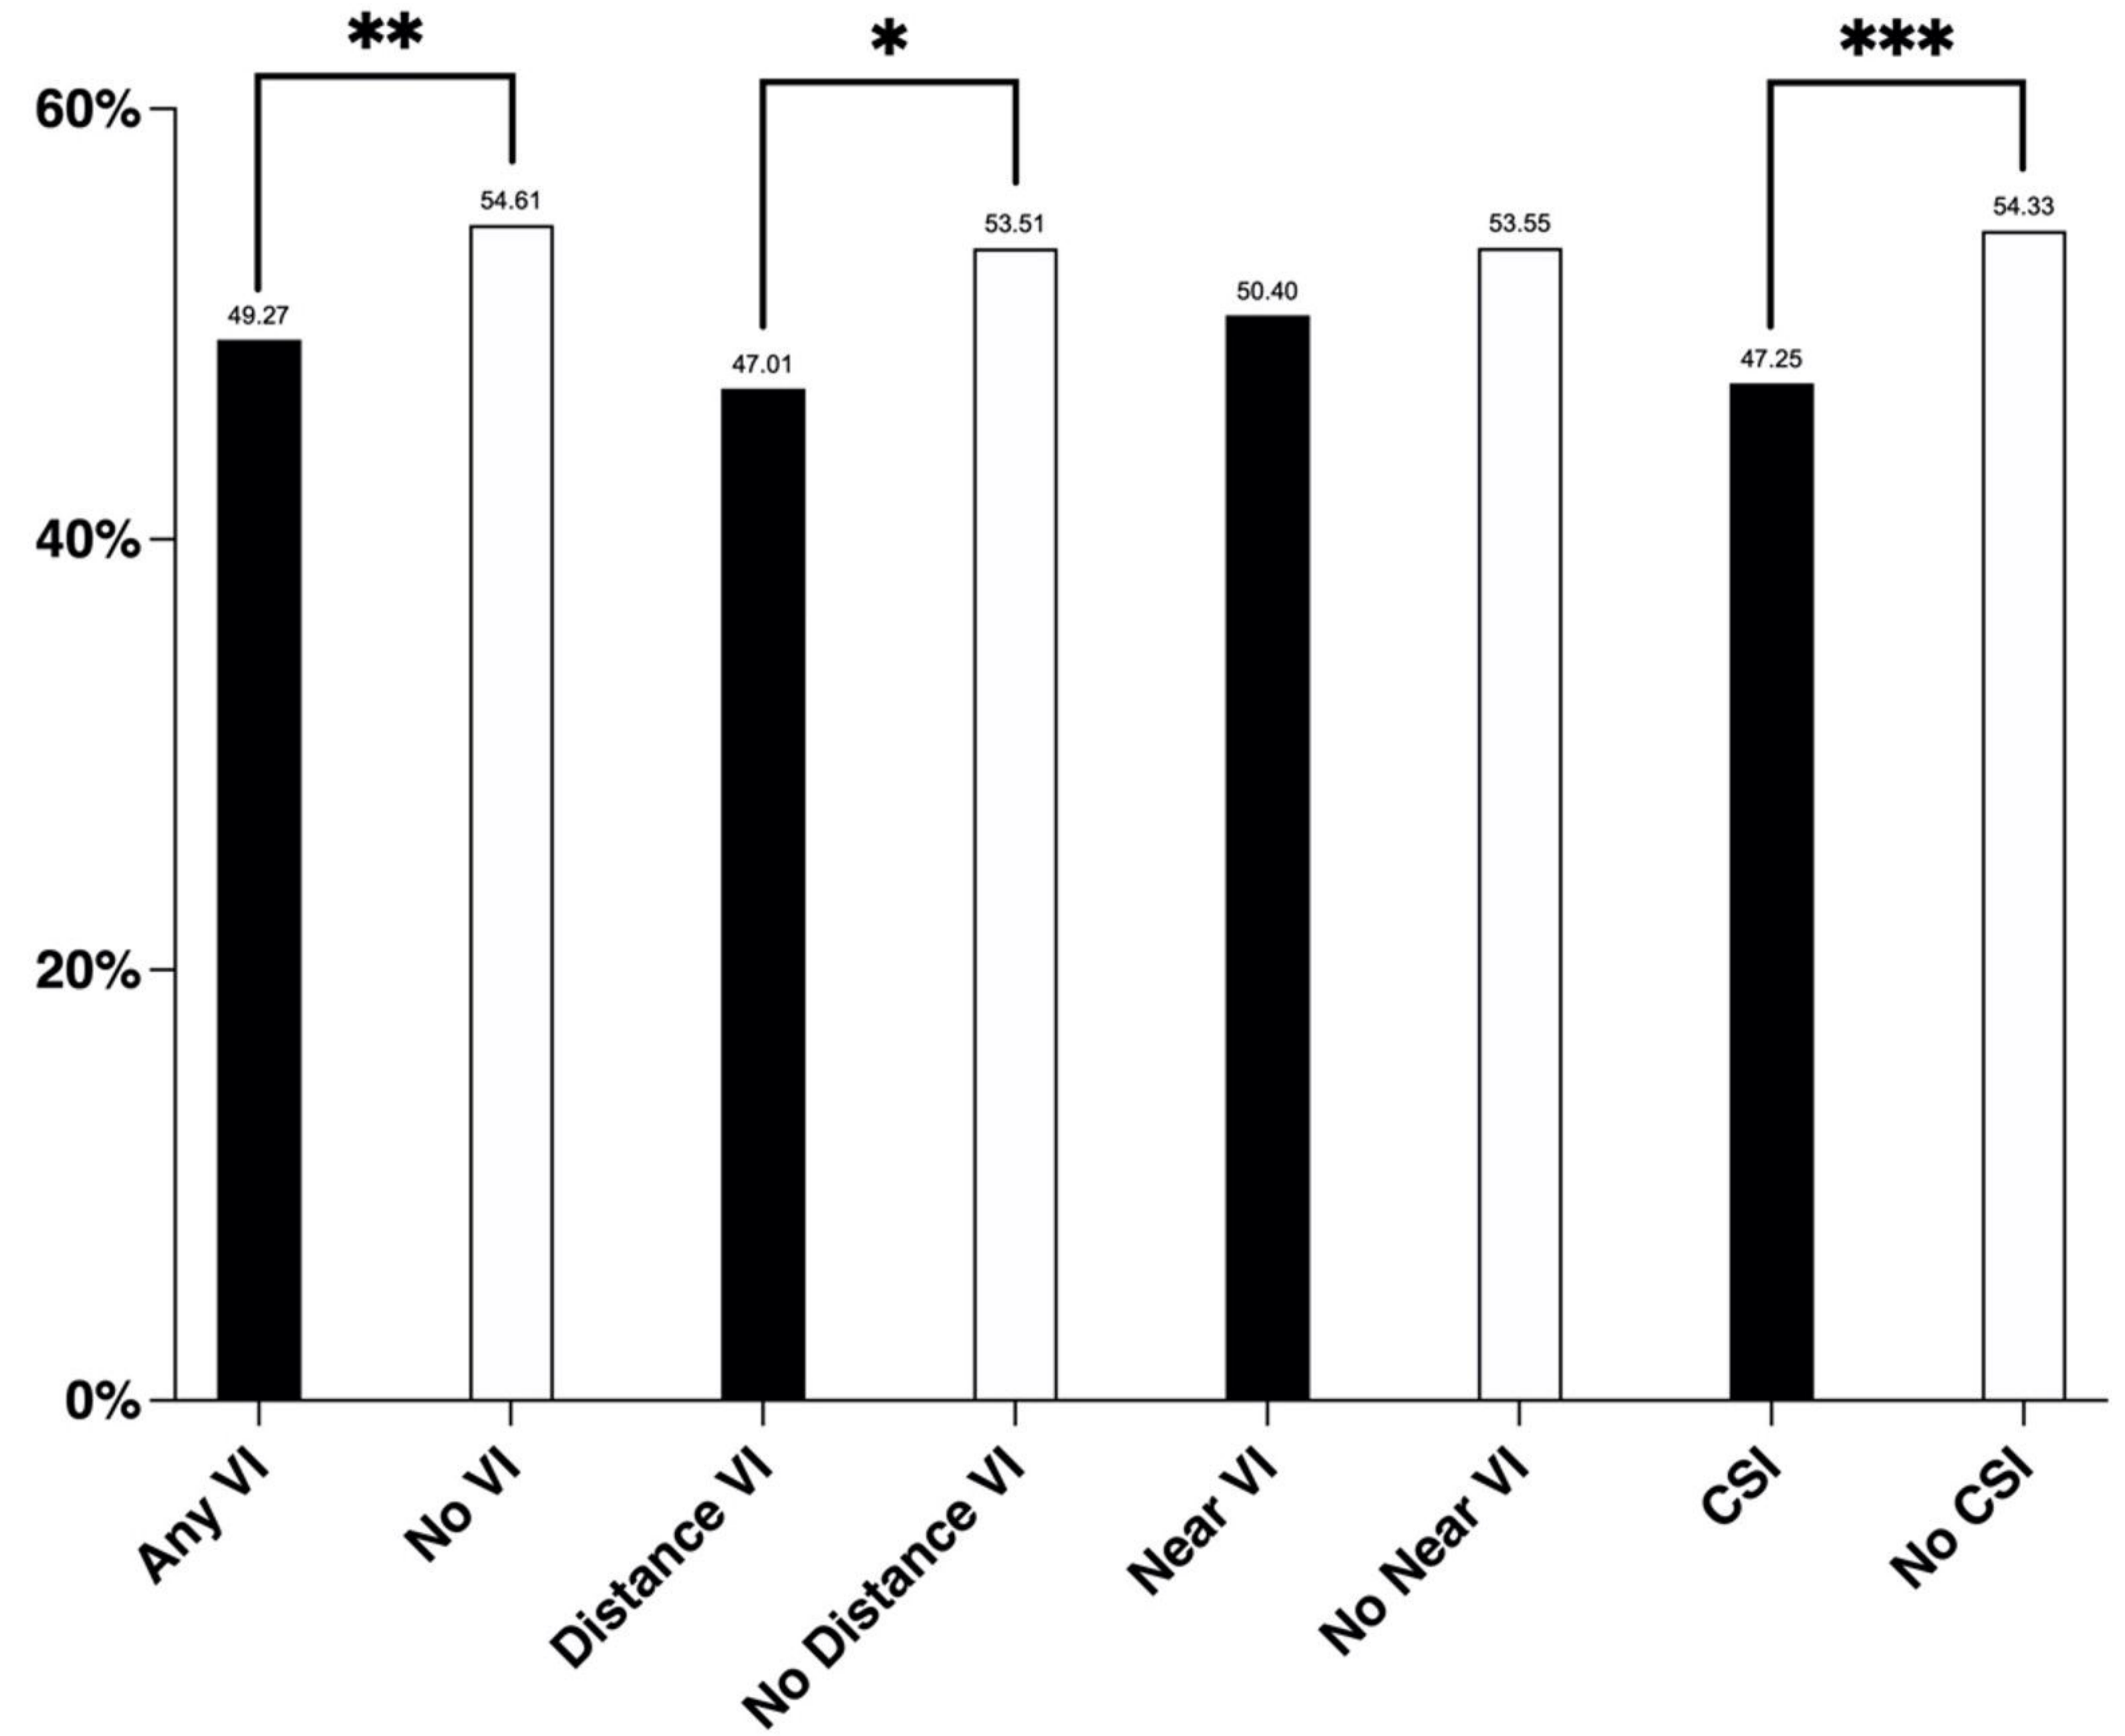

Source: https://medrxiv.org/content/10.1101/2023.08.23.23294511v1.full.pdf
